# Supplementary material for: Mitochondrial DNA and Electron Transport Chain Protein Levels Are Altered in Peripheral Nerve Tissues from Donors with HIV Sensory Neuropathy: A Pilot Study
Source: MDPI journal article supplement (doi:10.3390/ijms25094732), 2024-04-26
Supplement: s1 [file s1]

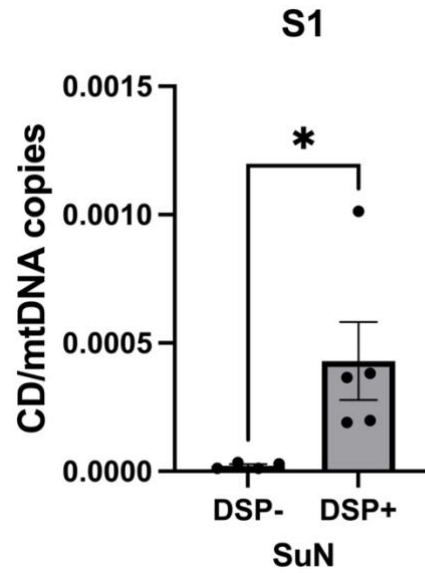

**S1:** mtDNA common deletion (CD) RA (relative abundance) in SuN (sural nerve) of PWH (people with HIV) with and without Distal sensory polyneuropathy (DSP). Removal of an individual with a markedly higher level of mtDNA common deletion RA (approximately 100 times more) compared to other mtDNA common deletion RA levels from DSP- group resulted in significantly increased mtDNA common deletion in the SuN of DSP+ compared to DSP- decedents.
