# Supplementary material for: Mitochondrial DNA and Electron Transport Chain Protein Levels Are Altered in Peripheral Nerve Tissues from Donors with HIV Sensory Neuropathy: A Pilot Study
Source: MDPI journal article supplement (doi:10.3390/ijms25094732), 2024-04-26
Supplement: s1 [file s1]

MFN2:

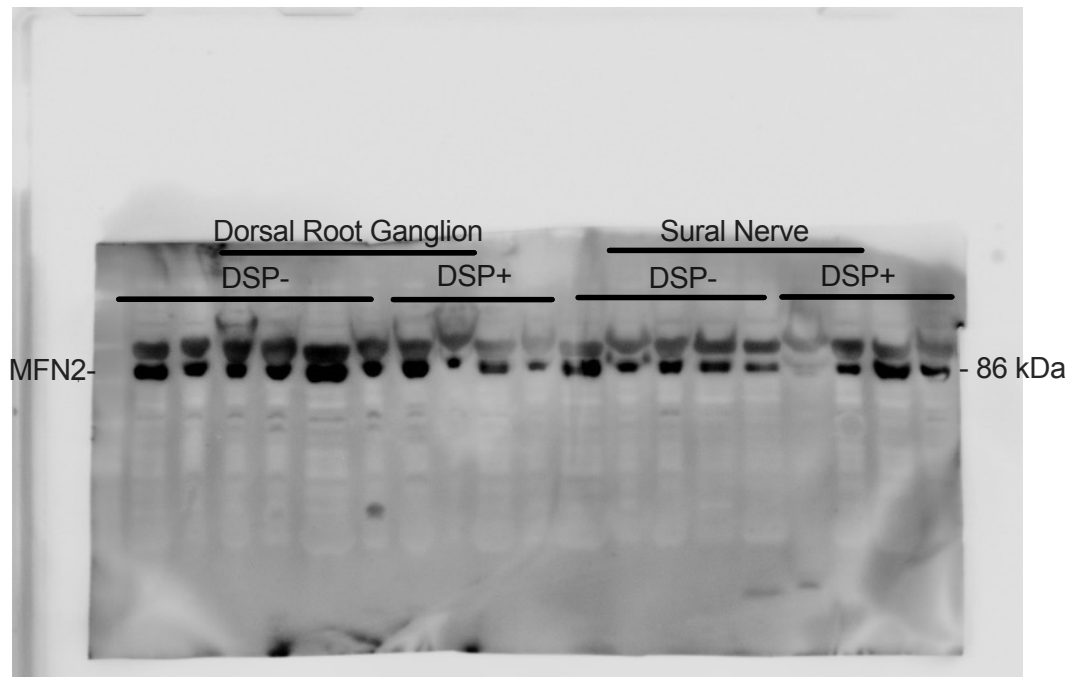

MFN1:

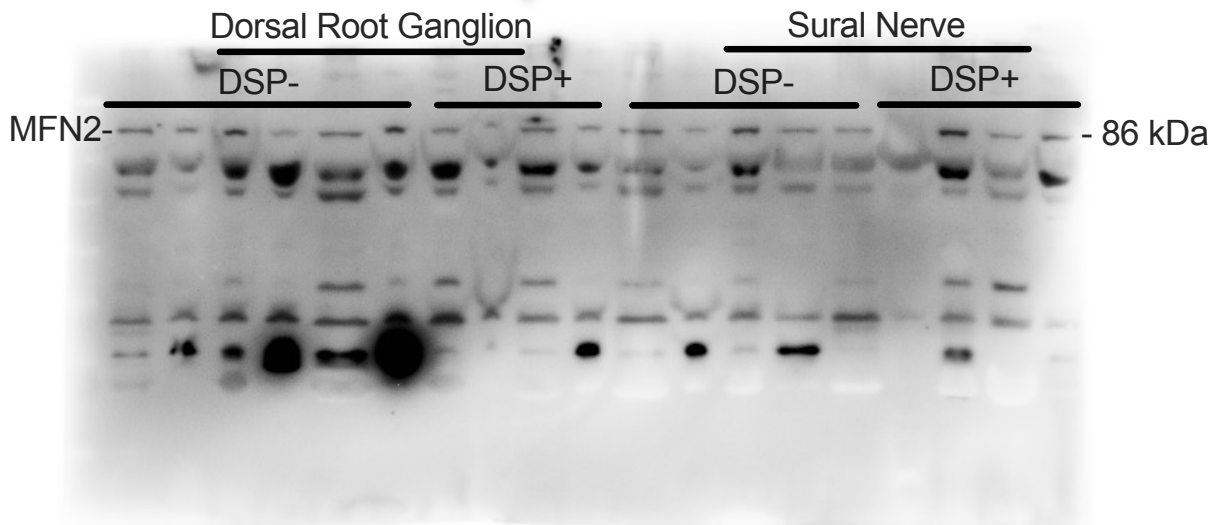

Western blot analysis showing DRP1 phosphorylation (pDRP1) and total DRP1 levels in Dorsal Root Ganglion (DRG) and Sural Nerve (SN) from DSP- and DSP+ mice. The blot is probed with anti-phospho-DRP1 (pDRP1) and anti-DRP1 antibodies. The top row shows pDRP1 bands, and the bottom row shows total DRP1 bands. Molecular weight markers are indicated on the right at 82 kD and 91 kD. The lanes are grouped by tissue (DRG and SN) and treatment (DSP- and DSP+). The DSP+ lanes show a prominent band at 82 kD, indicating increased phosphorylation of DRP1 compared to DSP- lanes.

Western blot analysis showing ACTB expression in Dorsal Root Ganglion (DRG) and Sural Nerve. The blot is divided into two main sections: Dorsal Root Ganglion and Sural Nerve. Each section contains two sub-sections: DSP- (Dorsal Sensory Pathway Negative) and DSP+ (Dorsal Sensory Pathway Positive). The ACTB- (ACTB) band is visible in all lanes, indicating equal protein loading across all samples.

pDRP1:

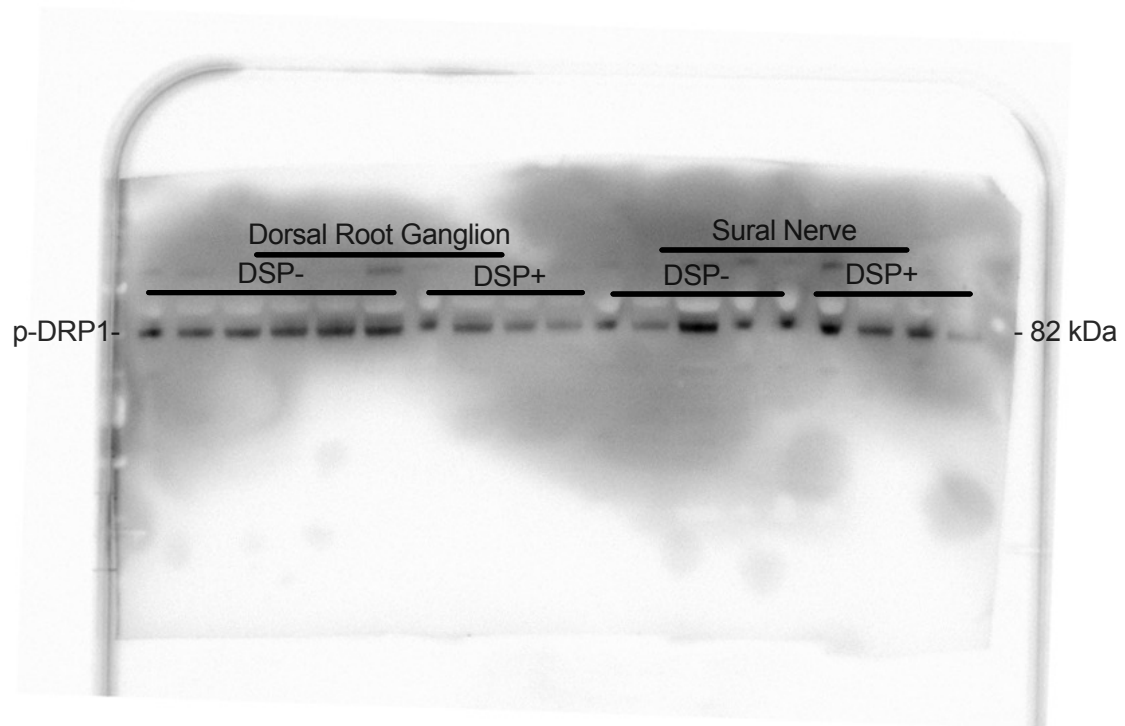

ACTB (e):

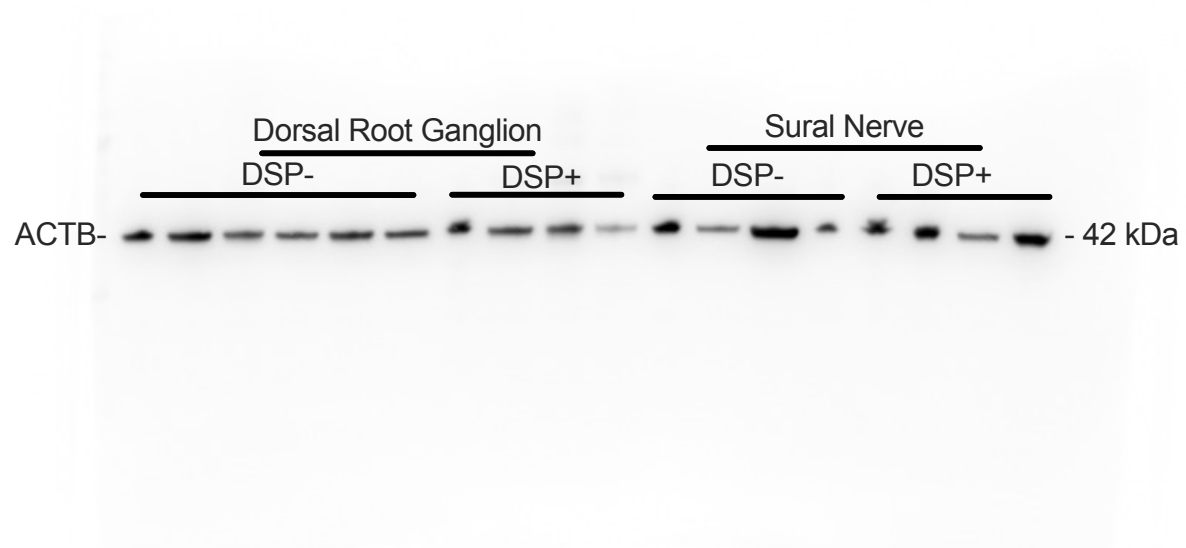

Western blot analysis showing the expression of synaptophysin (syn-pp III) and synaptobrevin (p II, p IV, p I) in Drosophila Dorsal Root Ganglion (DRG) and Sural Nerve. The blot is divided into two main sections: Dorsal Root Ganglion and Sural Nerve. Each section contains two lanes: DSP- (Dorsal Root Ganglion) and DSP+ (Sural Nerve). Molecular weight markers are indicated on the right: 54 kDa, 48 kDa, 29 kDa, 22 kDa, and 18 kDa. The syn-pp III band is prominent in the DSP- lanes and absent in the DSP+ lanes. The synaptobrevin bands (p II, p IV, p I) are present in both DSP- and DSP+ lanes, with p I being the most prominent band in both sections.

comp II-  
comp IV-  
comp I-

DSP-

DSP+

DSP-

DSP+

- 54 kDa
- 48 kDa

- 29 kDa  
- 22 kDa  
- 18 kDa
